# Supplementary material for: Low Incidence of Spontaneous Type 1 Diabetes in Non-Obese Diabetic Mice Raised on Gluten-Free Diets Is Associated with Changes in the Intestinal Microbiome
Source: PubMed Central journal article supplement (PMC3827256; doi:10.1371/journal.pone.0078687), 2013-11-13

Supplementary Figures:

Fig. S1A:

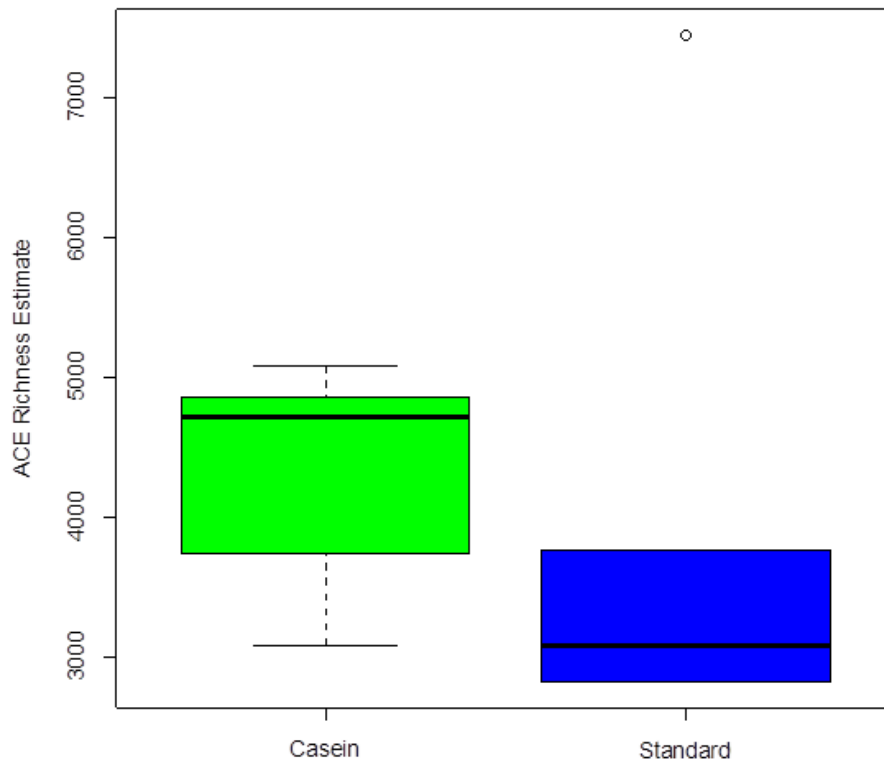

Fig. S1B:

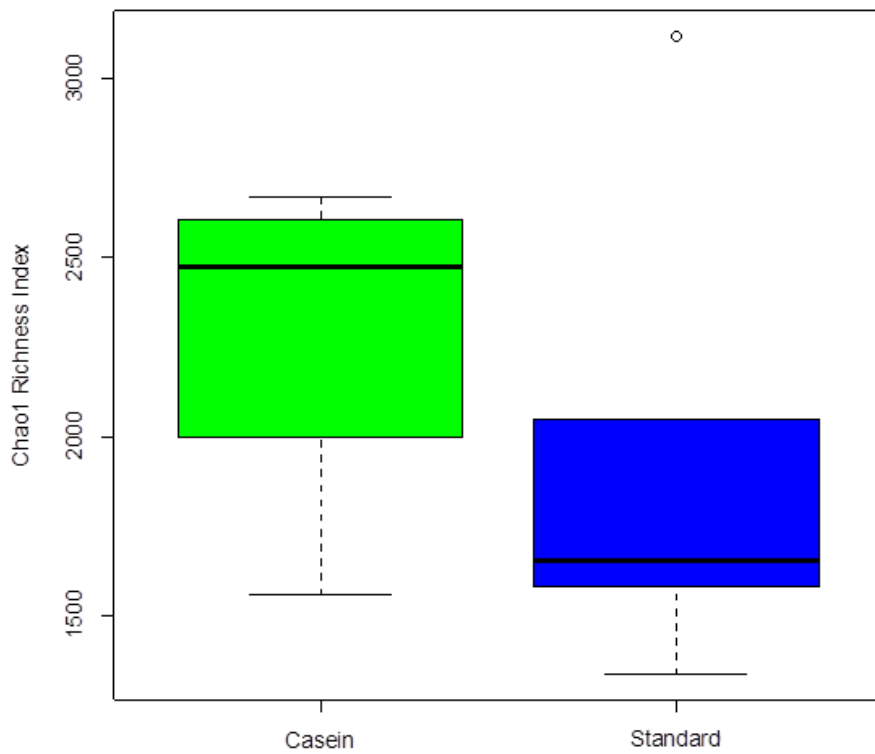

Fig. S1C:

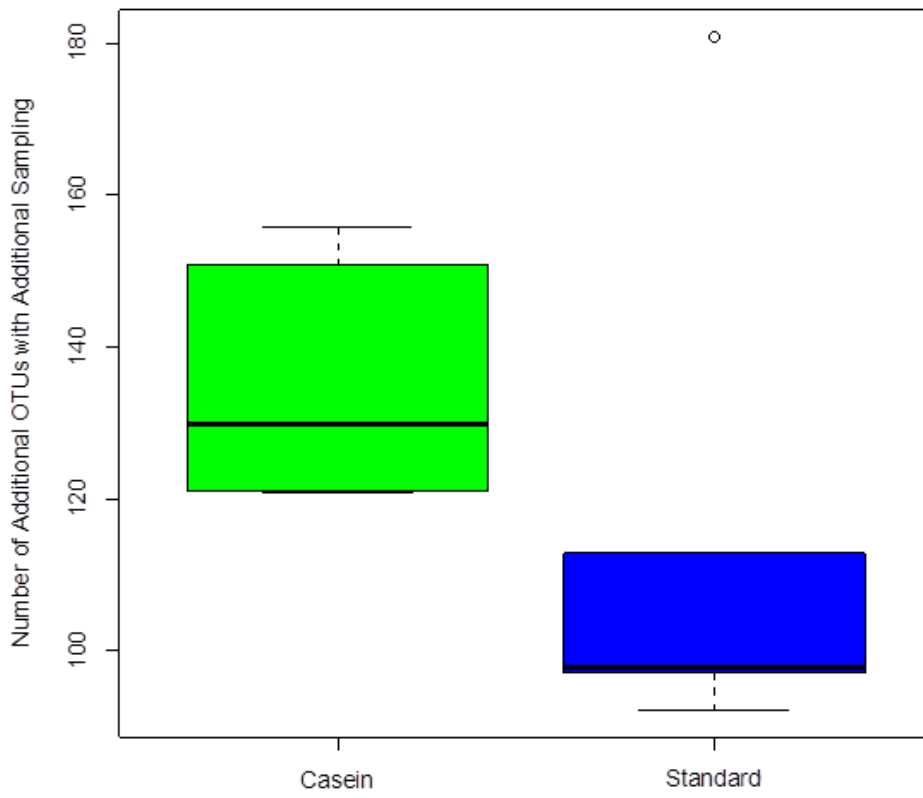

Fig. S1D:

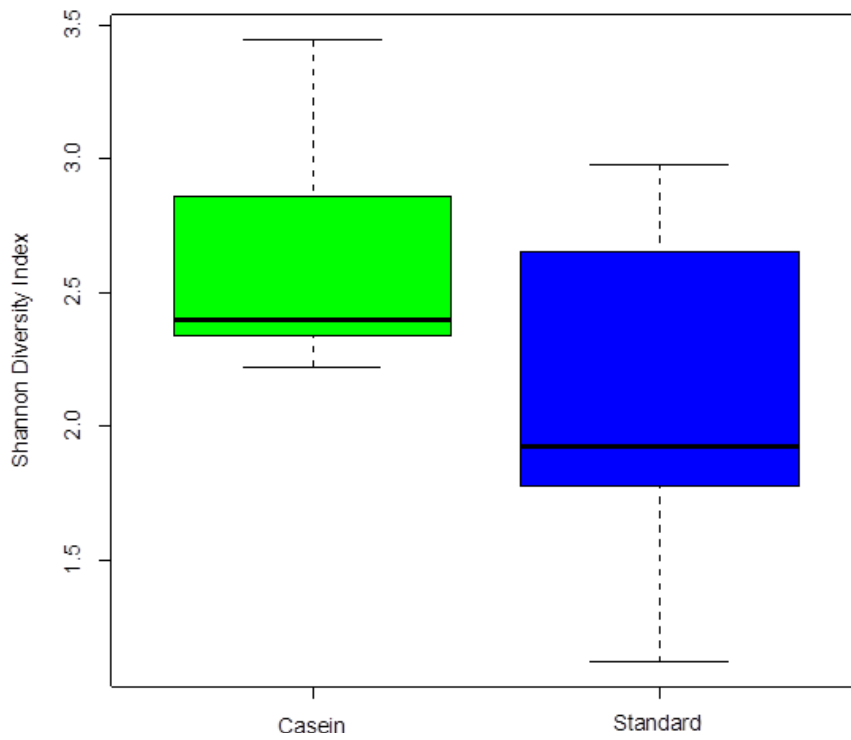

Fig. S1E:

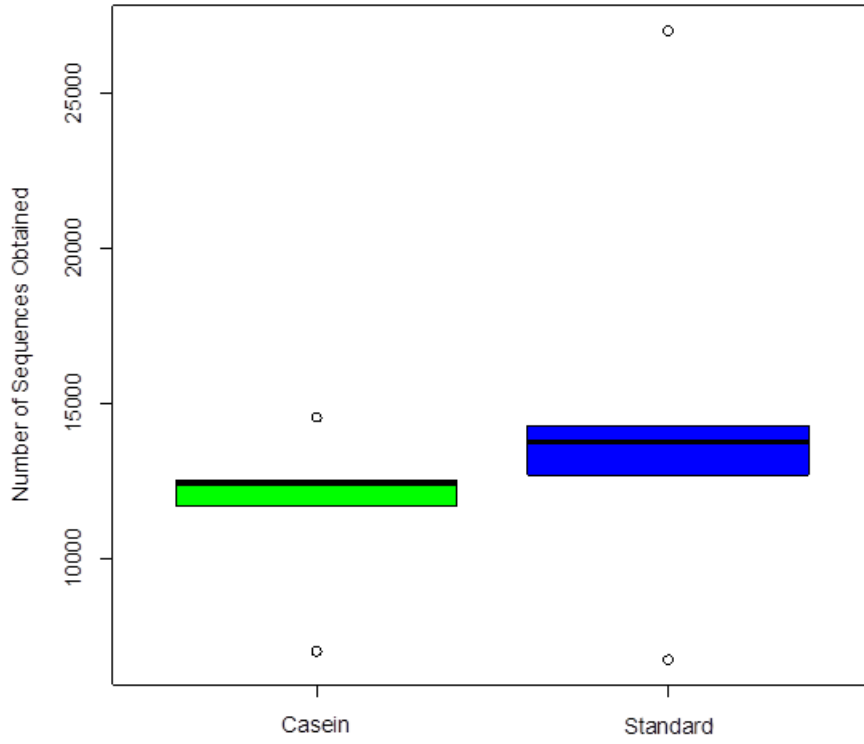

Fig. S2A:

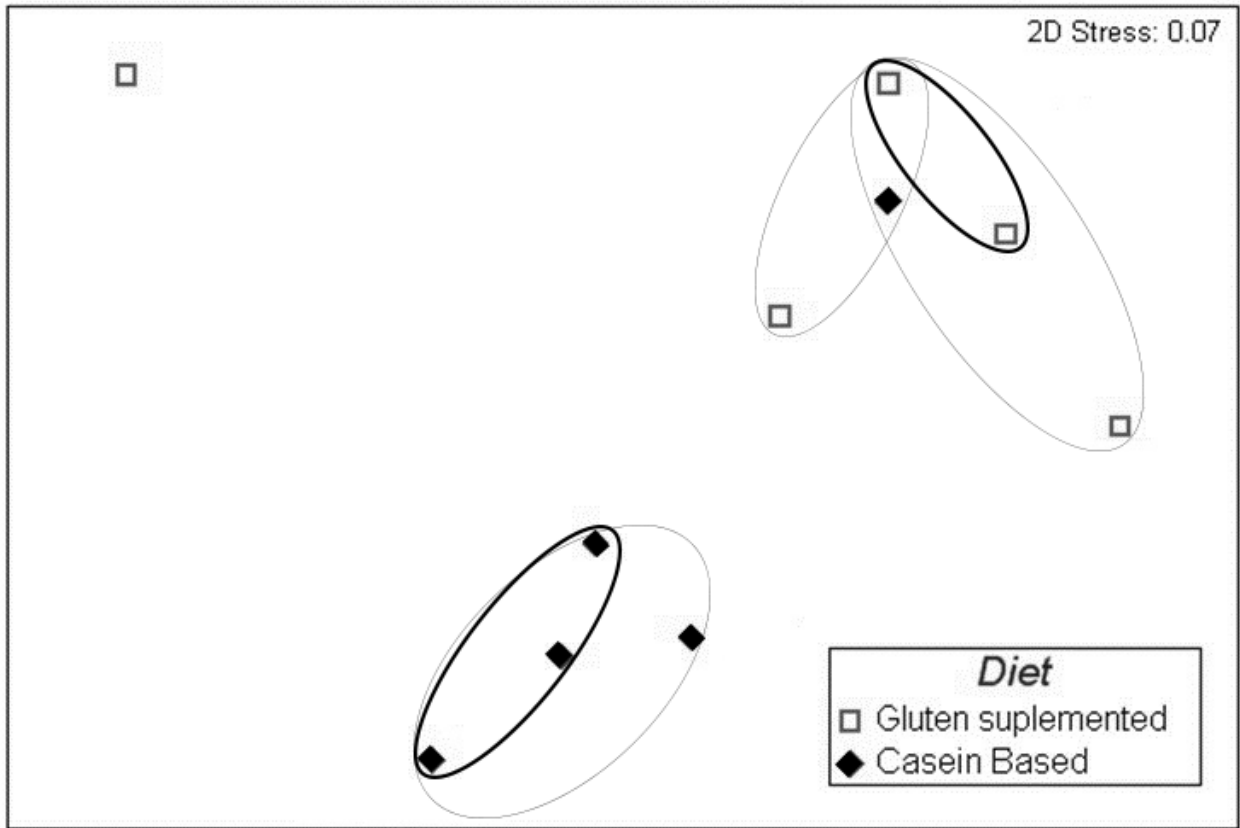

Fig. S2B:

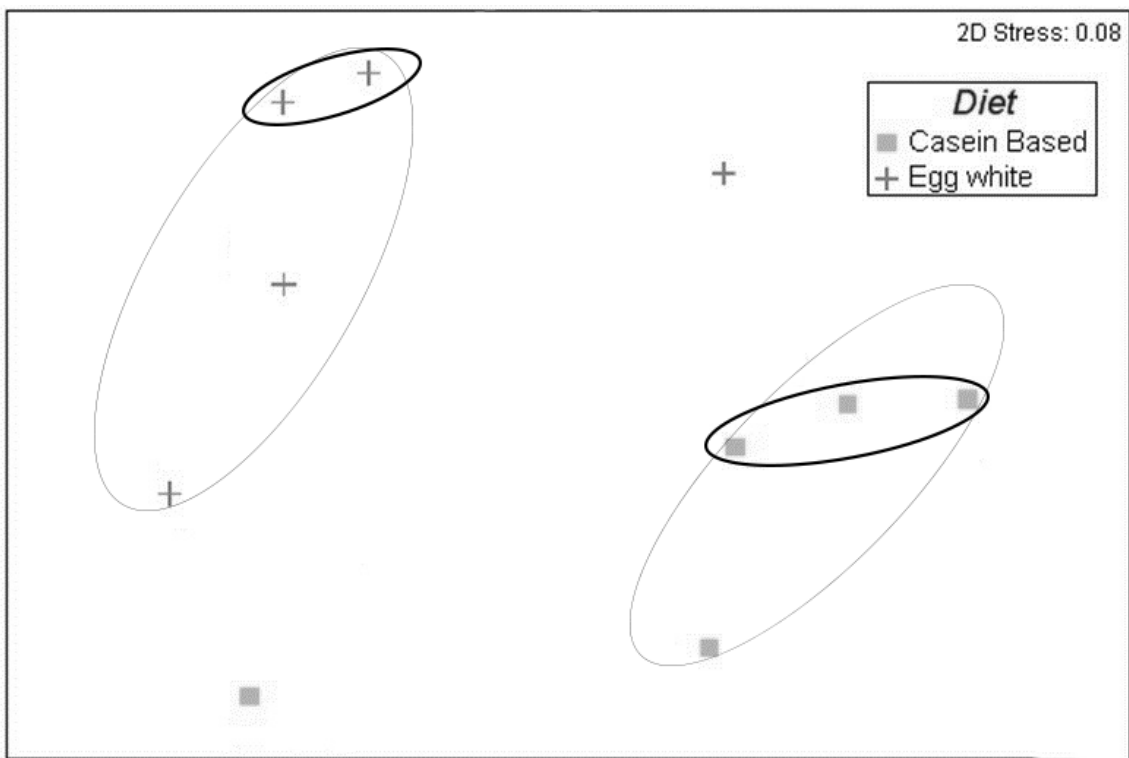

Fig. S2C:

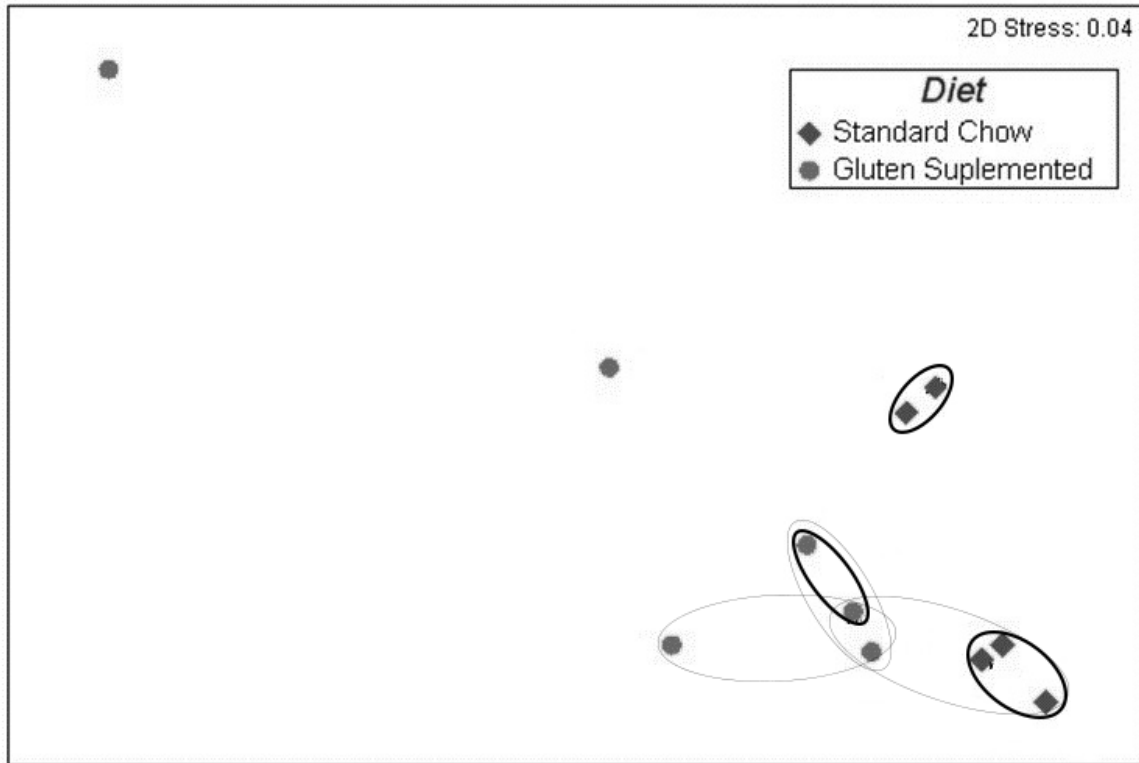

Fig. S2D:

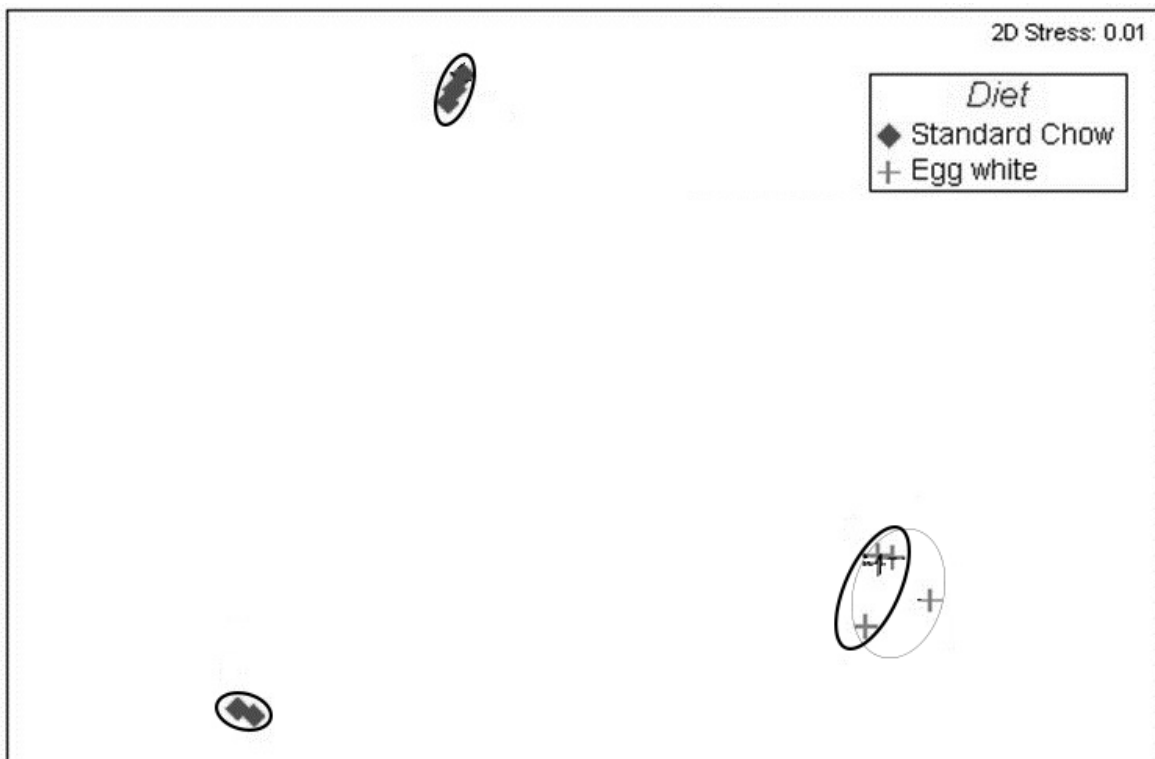

Fig. S3A:

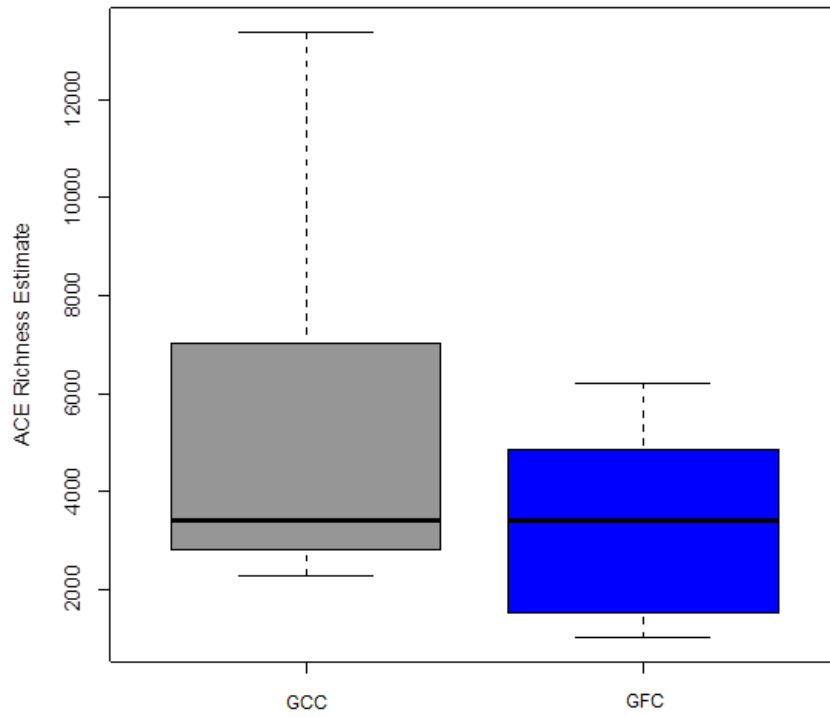

Fig. S3B:

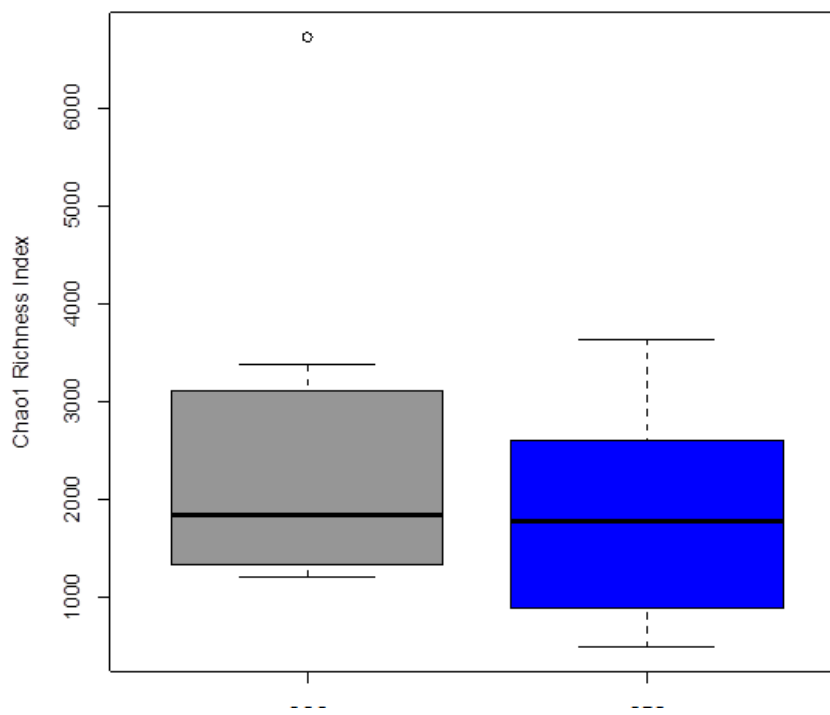

Fig. S3C:

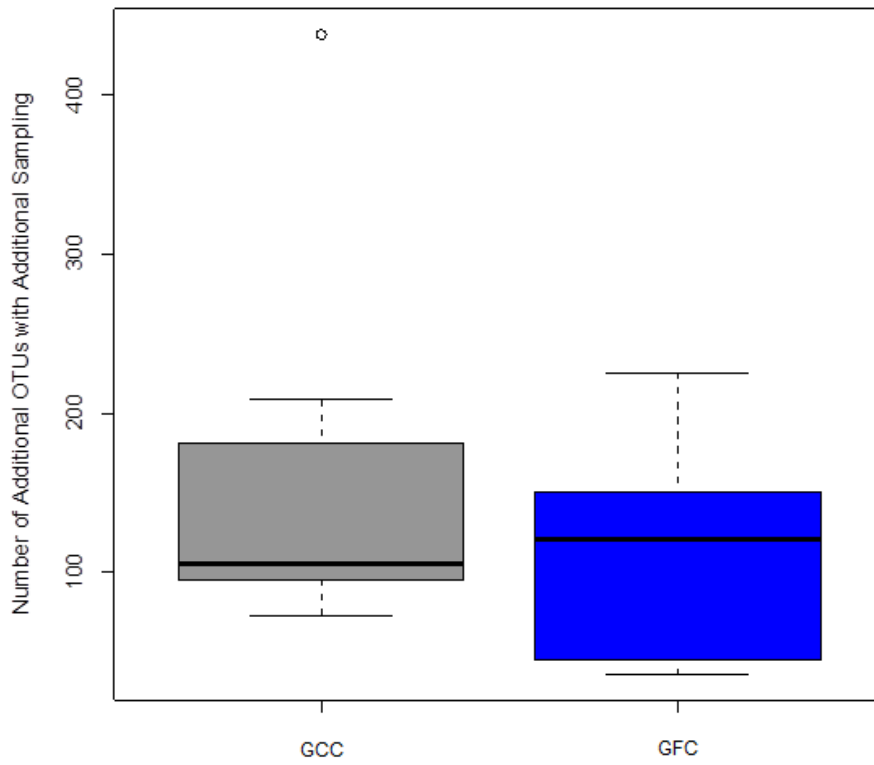

Fig. S3D:

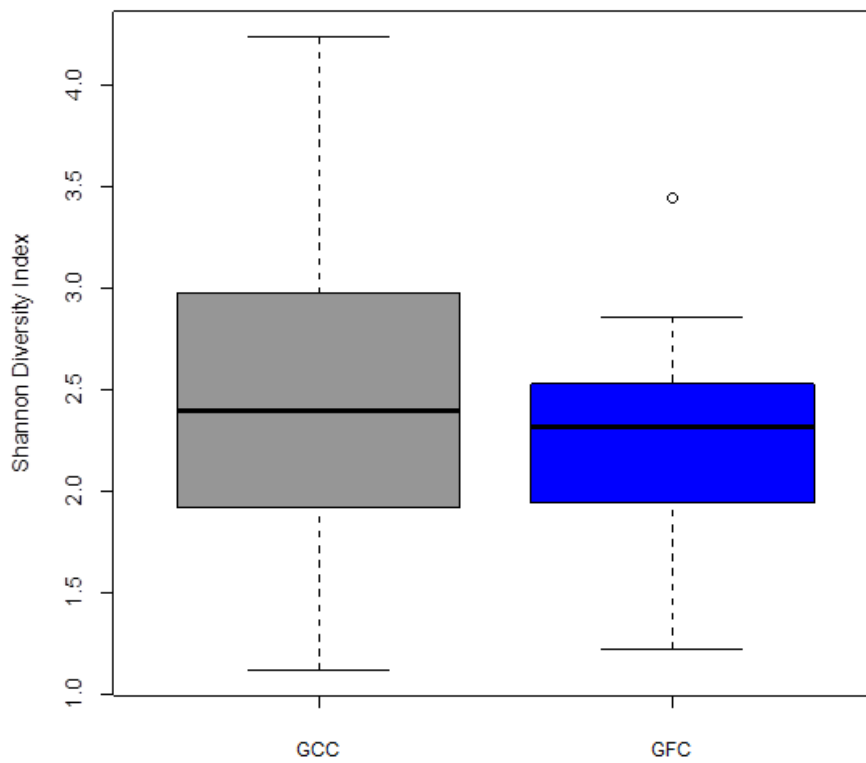

Fig. S3E:

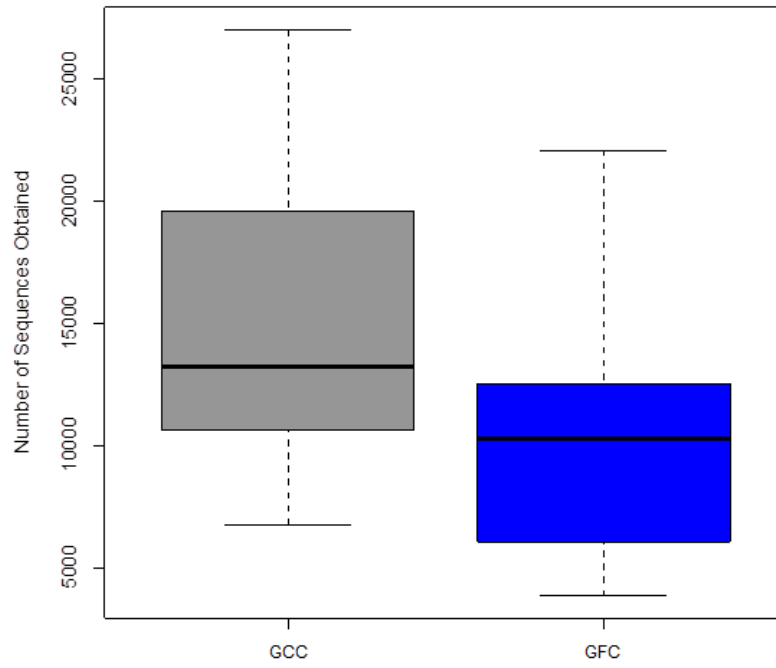

Supplement: pone.0078687.s001.pdf [file pone.0078687.s001.pdf]
